# Supplementary material
Source: ML conference proceedings conference paper supplement (https://proceedings.mlr.press/v129/costa20a.html)
Supplement: Supplementary file [file costa20a-supp.pdf]

# Supplementary Materials

## Learning 2-opt Heuristics for the Traveling Salesman Problem via Deep Reinforcement Learning

### 1. Performance on TSPLib Instances

We show the performance of our method in comparison to OR-Tools ([Perron and Furnon](#)) on 35 TSPLib ([Reinelt, 1991](#)) instances in Table 1 below.

Table 1: Performance of OR-Tools vs our method on TSPLib instances.

| Instance      | Opt.    | Ours {2,000}   | OR-Tools       |
|---------------|---------|----------------|----------------|
| eil51         | 426     | <b>427</b>     | 439            |
| berlin52      | 7,542   | 7,974          | <b>7,944</b>   |
| st70          | 675     | <b>680</b>     | 683            |
| eil76         | 538     | 552            | <b>548</b>     |
| pr76          | 108,159 | 111,085        | <b>110,948</b> |
| rat99         | 1,211   | 1,388          | <b>1,284</b>   |
| rd100         | 7,910   | <b>7,944</b>   | 8,221          |
| kroA100       | 21,282  | 23,751         | <b>21,960</b>  |
| kroB100       | 22,141  | 23,790         | <b>22,945</b>  |
| kroC100       | 20,749  | 22,672         | <b>21,699</b>  |
| kroD100       | 21,294  | 23,334         | <b>22,439</b>  |
| kroE100       | 22,068  | 23,253         | <b>22,551</b>  |
| eil101        | 629     | <b>635</b>     | 650            |
| lin105        | 14,379  | 16,156         | <b>15,363</b>  |
| pr107         | 44,303  | 54,378         | <b>44,573</b>  |
| pr124         | 59,030  | 59,516         | <b>60,413</b>  |
| bier127       | 118,282 | <b>121,122</b> | 121,729        |
| ch130         | 6,110   | <b>6,175</b>   | 6,329          |
| pr136         | 96,772  | <b>98,453</b>  | 102,813        |
| pr144         | 58,537  | 61,207         | <b>59,286</b>  |
| ch150         | 6,528   | <b>6,597</b>   | 6,733          |
| kroA150       | 26,524  | 30,078         | <b>27,503</b>  |
| kroB150       | 26,130  | 28,169         | <b>26,671</b>  |
| pr152         | 73,682  | <b>75,301</b>  | 75,832         |
| u159          | 42,080  | <b>42,716</b>  | 43,403         |
| rat195        | 2,323   | 2,955          | <b>2,375</b>   |
| kroA200       | 29,368  | 32,522         | <b>29,874</b>  |
| ts225         | 126,643 | <b>127,731</b> | 127,763        |
| tsp225        | 3,919   | 4,354          | <b>4,117</b>   |
| pr226         | 80,369  | 91,560         | <b>83,113</b>  |
| gil262        | 2,378   | <b>2,490</b>   | 2,517          |
| pr264         | 49,135  | 59,109         | <b>51,495</b>  |
| a280          | 2,579   | 2,898          | <b>2,742</b>   |
| pr299         | 48,191  | 59,422         | <b>50,617</b>  |
| pr439         | 107,217 | 143,590        | <b>117,171</b> |
| Avg. Opt. Gap | 0.00%   | 8.61%          | 3.70%          |

## References

Laurent Perron and Vincent Furnon. Or-tools. URL <https://developers.google.com/optimization/>.

Gerhard Reinelt. Tsplib—a traveling salesman problem library. *ORSA journal on computing*, 3(4):376–384, 1991.
